# Supplementary material
Source: PubMed Central journal article supplement (PMC3492541)
Supplement: NIHMS407588-supplement-1.pdf [file NIHMS407588-supplement-1.pdf]

## Supplementary Figures and Table

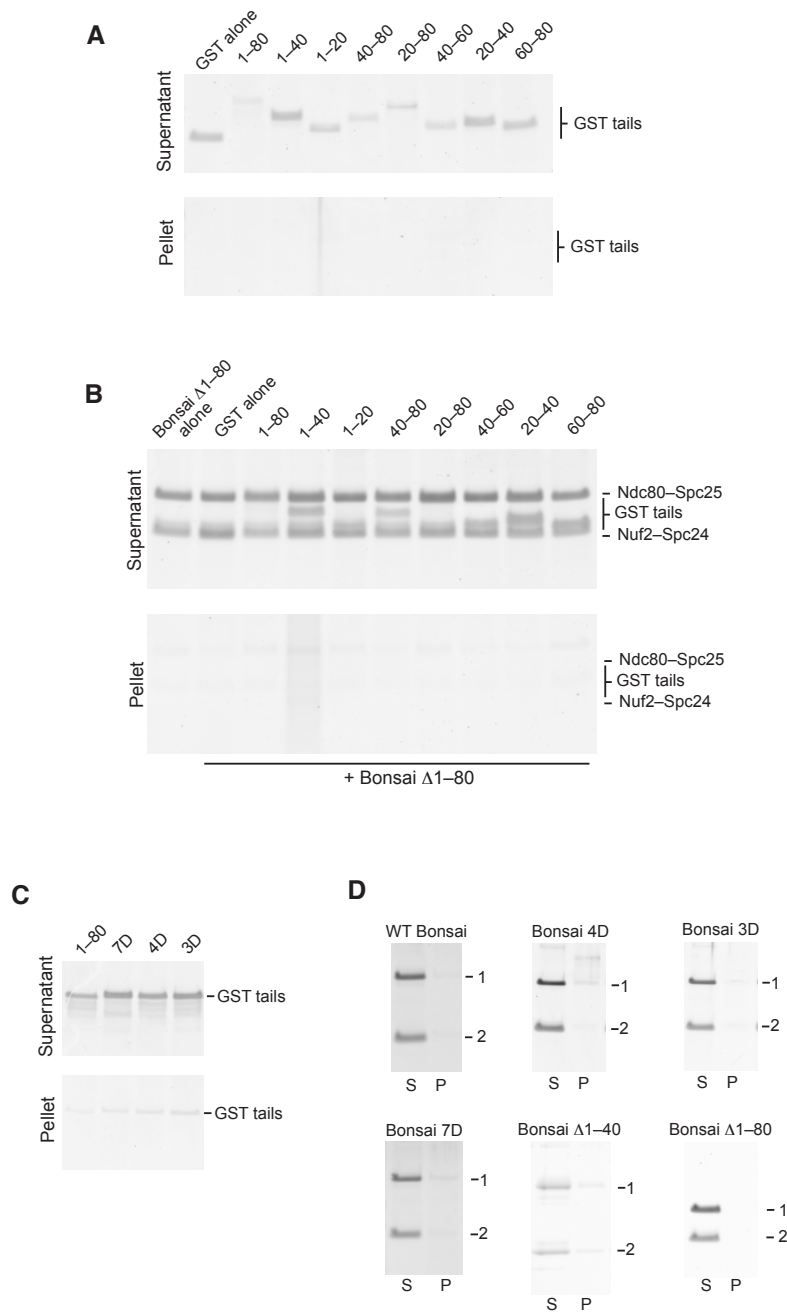

### Supplementary Figure 1. Self-pelleting controls of GST tail and Ndc80 bonsai constructs

SDS-PAGE of sedimentation experiments in identical conditions to the experiments in: A) Fig. 1d, B) Fig. 1e, C) Fig. 2b, D) Fig. 2d, except in the absence of microtubules. None of the constructs showed significant self-pelleting.



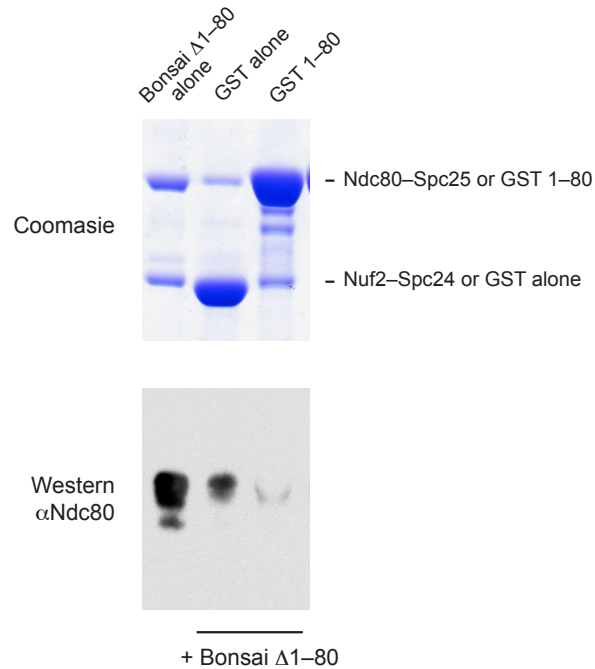

***Supplementary Figure 3. The Ndc80 tail does not interact with the Ndc80 globular head in trans in the absence of microtubules***

GST pull-down experiment, where the GST 1-80 tail construct or GST alone was mixed with bonsai Δ1-80. In the absence of GST, bonsai Δ1-80 interacts non-specifically with glutathione resin. This interaction is actually reduced when either GST alone or GST 1-80 is present, suggesting that there is no detectable interaction between the tail and the Ndc80 globular domain in the absence of microtubules.

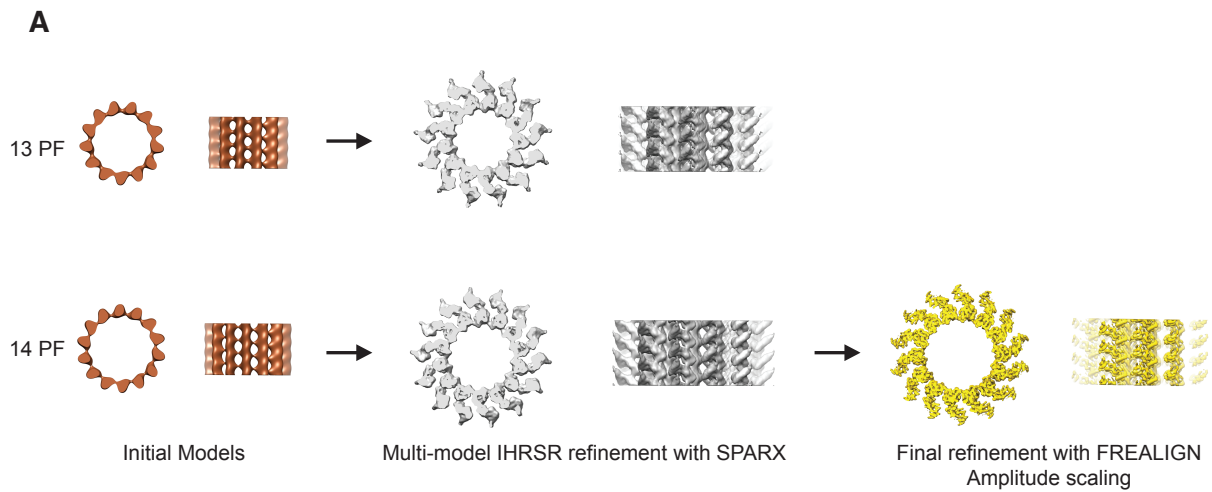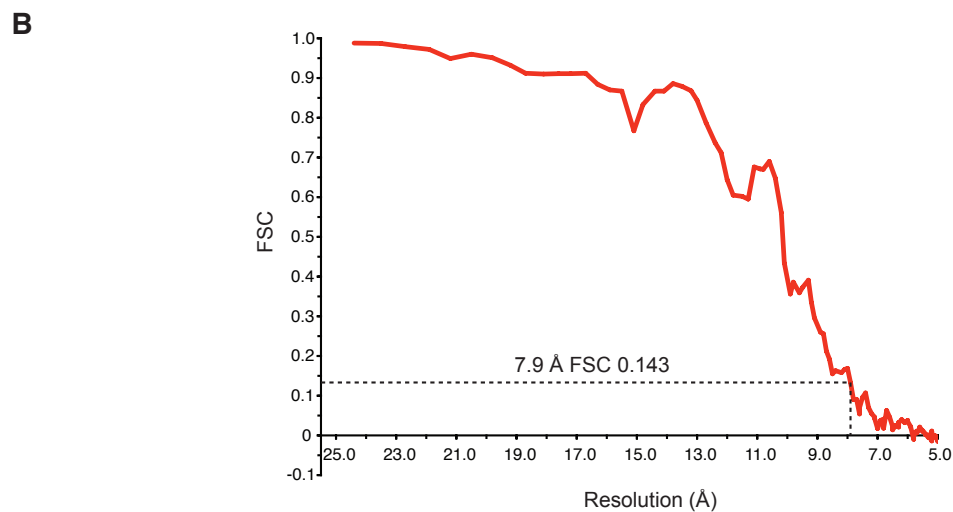

**Supplementary Figure 4. Improved cryo-EM reconstruction of the Ndc80–microtubule interface.**

A) Outline of the reconstruction process. The multi-model refinement strategy allowed a larger fraction of the data reported in ref. 23 to be aligned, and resulted in significantly improved resolution. The 14pf microtubule, which represented a larger fraction of the data, was chosen for high-resolution refinement with FREALIGN. B) Assessment by the Fourier Shell Correlation 0.143 criterion suggests a resolution of 7.9 Å.



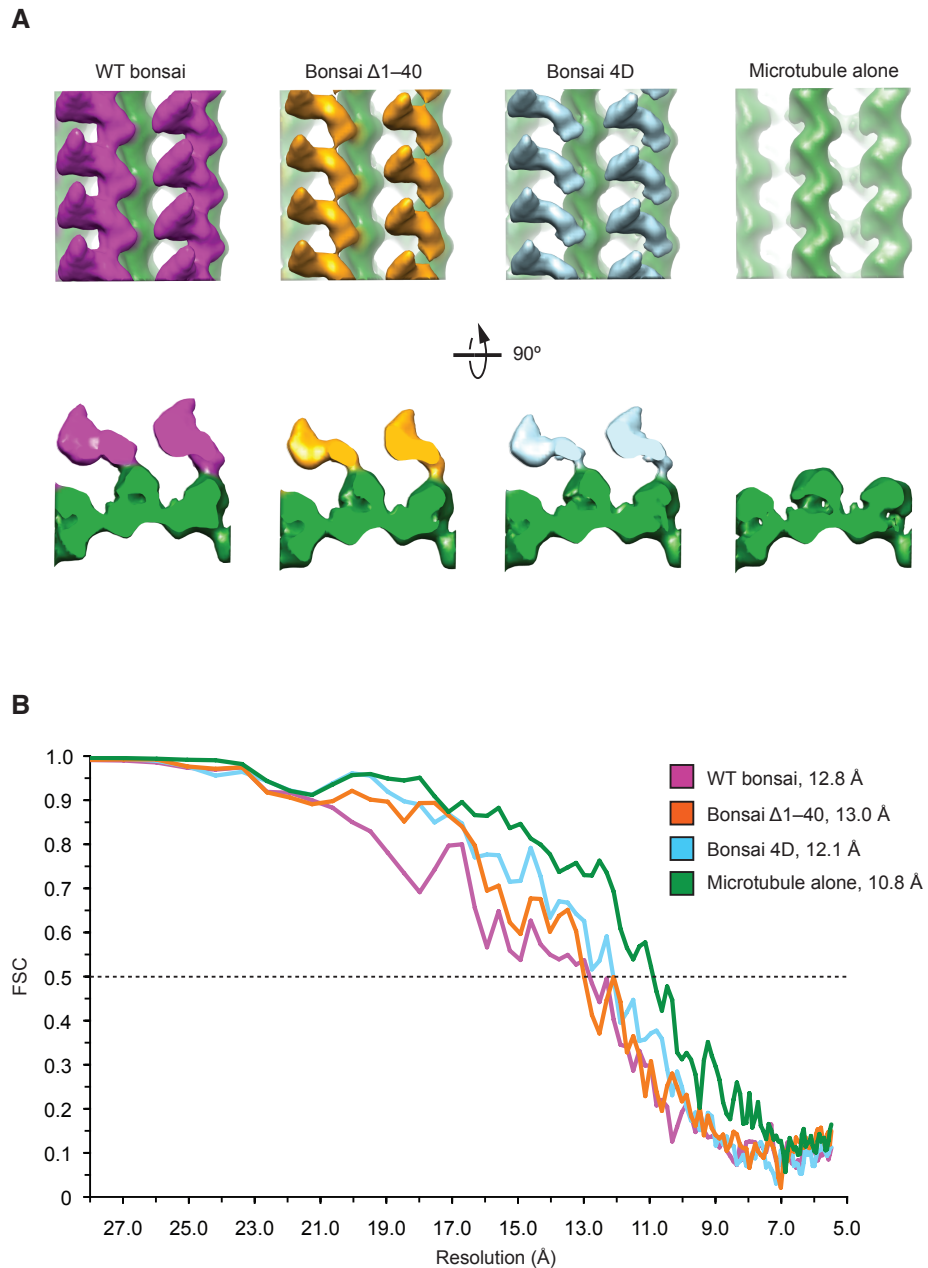

**Supplementary Figure 5. Cryo-EM reconstructions of bonsai mutants for difference map calculation**

A) Isosurface renderings of the 4 different reconstructions required for difference map calculation, contoured so that tubulin occupies equal volume. Note that the mutant bonsai constructs appear to be sub-stoichiometric, necessitating pre-subtraction of the microtubule for difference map analysis between the mutants and the wild-type. B) Assessment by the Fourier Shell Correlation 0.5 criterion shows all reconstructions have a resolution better than 13 Å.

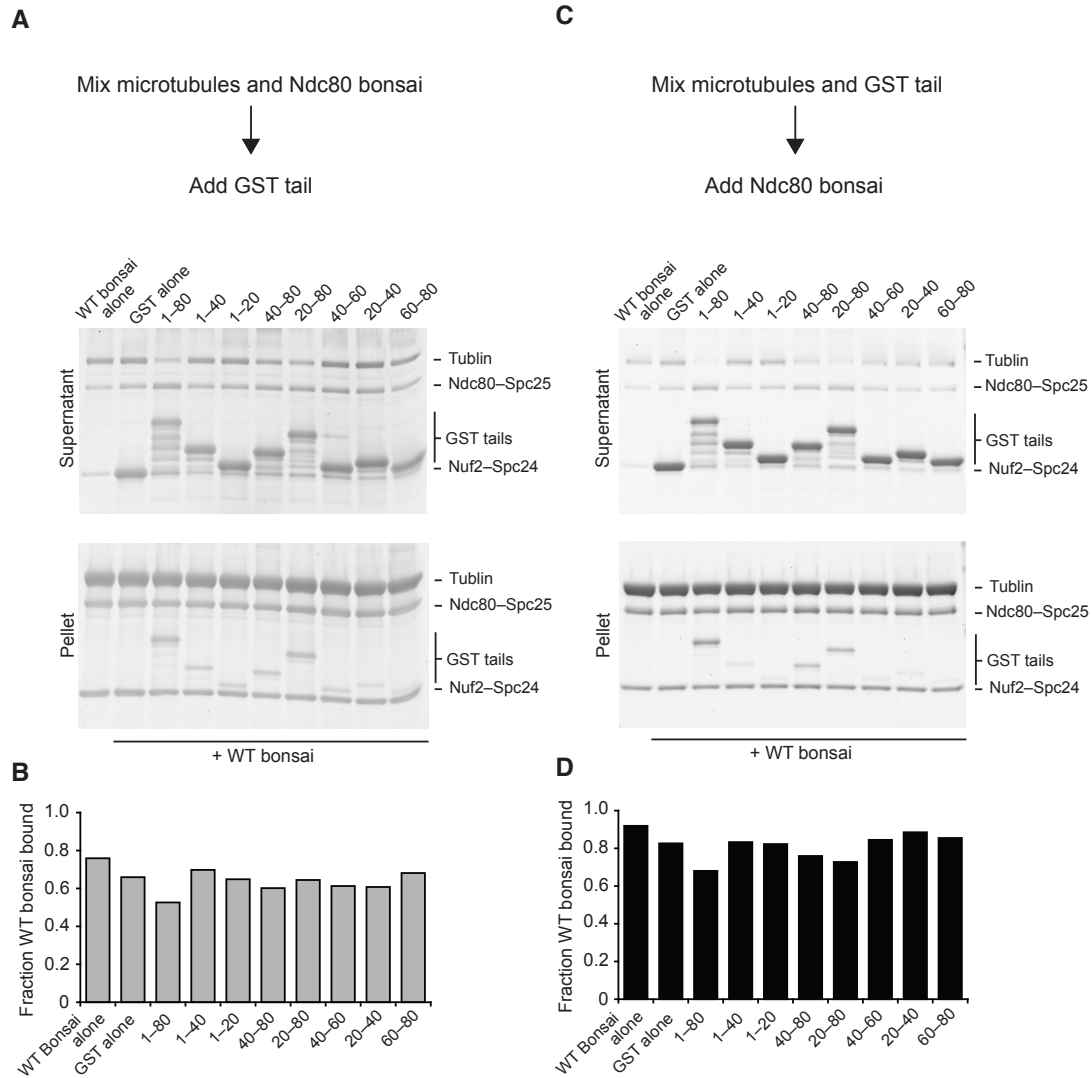

**Supplementary Figure 6. The Ndc80 bonsai outcompetes the Ndc80 tail for microtubule binding**

A) SDS-PAGE of competition microtubule co-sedimentation experiment where GST-tails and microtubules were premixed. Tubulin, 1  $\mu$ M, GST tails, 1  $\mu$ M, wild-type bonsai 0.5  $\mu$ M. B) Quantification of A,  $n = 1$ . C) SDS-PAGE of competition microtubule co-sedimentation experiment where wild-type bonsai and microtubules were premixed. D) Quantification of E,  $n = 1$ . Since the order of addition does not affect the outcome of the experiment, equilibrium is reached and the full bonsai complex outcompetes the N-terminal tail despite the tail being in excess.

|                      | Bonsai $\Delta 1-80$  | Bonsai 7D               | Bonsai $\Delta 1-40$ | Bonsai 3D            | Bonsai 4D               |
|----------------------|-----------------------|-------------------------|----------------------|----------------------|-------------------------|
| WT                   | $8.8 \times 10^{-12}$ | $3.1 \times 10^{-12}$   | $3.0 \times 10^{-3}$ | $8.2 \times 10^{-7}$ | $2.2 \times 10^{-7}$    |
| Bonsai $\Delta 1-80$ |                       | $6.1 \times 10^{-1***}$ | $3.7 \times 10^{-7}$ | $1.2 \times 10^{-3}$ | $6.1 \times 10^{-4}$    |
| Bonsai 7D            |                       |                         | $1.1 \times 10^{-7}$ | $3.7 \times 10^{-4}$ | $1.4 \times 10^{-4}$    |
| Bonsai $\Delta 1-40$ |                       |                         |                      | $1.8 \times 10^{-2}$ | $7.5 \times 10^{-3}$    |
| Bonsai 3D            |                       |                         |                      |                      | $8.2 \times 10^{-1***}$ |

***Supplementary Table 1. Pairwise statistical comparisons between cluster distributions***

*P* values from Welch's t-tests between the distributions shown in Fig. 3c. The comparisons bonsai 7D vs. bonsai  $\Delta 1-80$  and bonsai 3D vs. bonsai 4D both give *P* values greater than  $\alpha(0.05)$ , indicated by asterisks.

***Supplementary Movie1 - Cryo-EM structure of the Ndc80–microtubule interface***

Supplements Fig. 5A. Crystal structures of two bonsai  $\Delta 1-80$  molecules (PDB 2VE7) and tubulin (PDB 1JFF) docked into the improved cryo-EM density map, colored as in Fig. 5A. Two densities not occupied by the crystal structures (magenta) were interpreted as corresponding to ordered regions of the N-terminal tail.

***Supplementary Movie2 - Visualizing the Ndc80–E hook interface***

Supplements Fig. 5C. Same as Supplementary Movie1, but with the cryo-EM map displayed at a lower threshold, where the tubulin E hooks (red) are visible.
